# Supplementary material
Source: PubMed Central journal article supplement (PMC1490311)
Supplement: NIHMS2110-supplement-Proof.pdf [file NIHMS2110-supplement-Proof.pdf]

# Supplementary Material – Activities and Sensitivities in Boolean Network Models

Ilya Shmulevich<sup>1</sup> and Stuart A. Kauffman<sup>2,1</sup>

<sup>1</sup>Cancer Genomics Laboratory

University of Texas M.D. Anderson Cancer Center  
Houston, TX 77030

<sup>2</sup>Department of Cell Biology and Physiology

University of New Mexico Health Sciences Center  
Albuquerque, NM 87131

April 19, 2004

## Abstract

In this appendix, we give a proof of the fact that the expected activity vector of a random canalizing function with one canalizing variable is equal to  $E[\alpha^f] = (\frac{1}{2}, \frac{1}{4}, \dots, \frac{1}{4})$ .

Let the symbols  $\vee$  and  $\wedge$  denote the Boolean disjunction and conjunction, respectively. Also, recall that  $\wedge$  takes precedence over  $\vee$  so that writing  $a \vee b \wedge c$  is the same as  $a \vee (b \wedge c)$ . Let  $f(x_1, \dots, x_K)$  be a random canalizing function of the form

$$f(x_1, \dots, x_K) = x_1 \vee g(x_2, \dots, x_K),$$

where  $g$  is chosen randomly from the set of all  $2^{2^{K-1}}$  Boolean functions. Without loss of generality, we are supposing that the first variable,  $x_1$ , is a canalizing variable. Furthermore, the discussion for other types of canalizing functions (e.g.,  $f(x_1, \dots, x_K) = x_1 \wedge g(x_2, \dots, x_K)$ ) would be nearly identical. Our first aim is to characterize the activities of each of the variables, which are also random variables themselves by virtue of  $f$  being random. It

is clear that the activity of variables  $x_2, \dots, x_K$  should behave identically in the probabilistic sense if  $g(x_2, \dots, x_K)$  is a random unbiased function. Consequently, it will suffice to examine the activity of variable  $x_2$ , with the other variables behaving identically.

Let us first compute  $\alpha_1^f$  – the activity of  $x_1$  in  $f$ . Firstly, we have

$$\begin{aligned} \frac{\partial f}{\partial x_1} &= (0 \vee g(x_2, \dots, x_K)) \oplus (1 \vee g(x_2, \dots, x_K)) \\ &= g(x_2, \dots, x_K) \oplus 1 \\ &= g'(x_2, \dots, x_K). \end{aligned}$$

Now, since  $g$  is a random unbiased function (i.e.  $p = 1/2$ ), the expected activity of the canalizing variable  $x_1$  is equal to

$$\begin{aligned} E[\alpha_1^f] &= E[2^{-(K-1)} \cdot \sum_{\mathbf{x} \in \{0,1\}^{K-1}} g'(x_2, \dots, x_K)] \\ &= 2^{-(K-1)} \cdot \sum_{\mathbf{x} \in \{0,1\}^{K-1}} E[g'(x_2, \dots, x_K)] \\ &= 2^{-(K-1)} \cdot \sum_{\mathbf{x} \in \{0,1\}^{K-1}} \frac{1}{2} \\ &= \frac{1}{2}. \end{aligned}$$

Now let us consider the expected activity of variable  $x_2$ . We have

$$\begin{aligned} \frac{\partial f}{\partial x_2} &= (x_1 \vee g(\mathbf{x}^{(2,0)})) \oplus (x_1 \vee g(\mathbf{x}^{(2,1)})) \\ &= (x_1 \vee g(\mathbf{x}^{(2,0)})) \wedge (x_1 \vee g(\mathbf{x}^{(2,1)}))' \\ &\quad \vee (x_1 \vee g(\mathbf{x}^{(2,0)}))' \wedge (x_1 \vee g(\mathbf{x}^{(2,1)})) \\ &= (x_1 \vee g(\mathbf{x}^{(2,0)})) \wedge (x_1' \wedge g'(\mathbf{x}^{(2,1)})) \\ &\quad \vee (x_1' \wedge g'(\mathbf{x}^{(2,0)})) \wedge (x_1 \vee g(\mathbf{x}^{(2,1)})) \\ &= x_1' \wedge g(\mathbf{x}^{(2,0)}) \wedge g'(\mathbf{x}^{(2,1)}) \vee x_1' \wedge g'(\mathbf{x}^{(2,0)}) \wedge g(\mathbf{x}^{(2,1)}) \\ &= x_1' \wedge (g(\mathbf{x}^{(2,0)}) \oplus g(\mathbf{x}^{(2,1)})) \\ &= x_1' \wedge \frac{\partial g}{\partial x_2}, \end{aligned}$$

where in the second equality we used the fact that  $a \oplus b = a \wedge b' \vee a' \wedge b$ , in the third equality we used de Morgan's identity:  $(a \vee b)' = a' \wedge b'$ , in the fifth equality we again used the definition of  $\oplus$ , and in the last equality, we used the definition of partial derivative. The expected activity of variable  $x_2$  is now equal to

$$E \left[ \alpha_2^f \right] = E \left[ 2^{-(K-1)} \cdot \sum_{\mathbf{x} \in \{0,1\}^{K-1}} x_1' \wedge \frac{\partial g}{\partial x_2} \right].$$

Note that  $\frac{\partial g(x_2, \dots, x_K)}{\partial x_2}$  is a Boolean function of  $K - 2$  variables and the above summation is taken over all  $\mathbf{x} = (x_1, x_3, \dots, x_K)$ . Let us break up this summation into parts, corresponding to  $x_1 = 0$  and  $x_1 = 1$ . We have

$$\begin{aligned} E \left[ \alpha_2^f \right] &= 2^{-(K-1)} \cdot \left[ \sum_{\mathbf{x}^{(1,0)} \in \{0,1\}^{K-1}} E \left[ 1 \wedge \frac{\partial g}{\partial x_2} \right] + \sum_{\mathbf{x}^{(1,1)} \in \{0,1\}^{K-1}} E \left[ 0 \wedge \frac{\partial g}{\partial x_2} \right] \right] \\ &= 2^{-(K-1)} \cdot \sum_{\mathbf{x}^{(1,0)} \in \{0,1\}^{K-1}} E \left[ \frac{\partial g}{\partial x_2} \right]. \end{aligned}$$

Since  $g$  is a random unbiased function, so is  $\frac{\partial g}{\partial x_2}$ . This essentially means that the probability that a random function  $g$  differs on  $\mathbf{x}^{(j,0)}$  and  $\mathbf{x}^{(j,1)}$  is equal to  $1/2$ . Thus,

$$E \left[ \alpha_2^f \right] = 2^{-(K-1)} \cdot \sum_{\mathbf{x}^{(1,0)} \in \{0,1\}^{K-1}} \frac{1}{2}$$

and since there are exactly  $2^{K-2}$  different vectors  $\mathbf{x}^{(1,0)} = (0, x_3, \dots, x_K)$ ,

$$E \left[ \alpha_2^f \right] = 2^{-(K-1)} \cdot \frac{1}{2} \cdot 2^{K-2} = \frac{1}{4}.$$

Thus, the expected activity of all non-canalizing variables is equal to  $1/4$ . The expected activity vector is then equal to  $E[\boldsymbol{\alpha}^f] = (\frac{1}{2}, \frac{1}{4}, \dots, \frac{1}{4})$  and the expected sensitivity is equal to  $E[s(f)] = \frac{1}{2} + \frac{1}{4} \cdot (K - 1) = (K + 1)/4$ .
